# Supplementary material for: Increased precipitation enhances soil respiration in a semi-arid grassland on the Loess Plateau, China
Source: PubMed Central journal article supplement (PMC7863787; doi:10.7717/peerj.10729), 2021-02-02

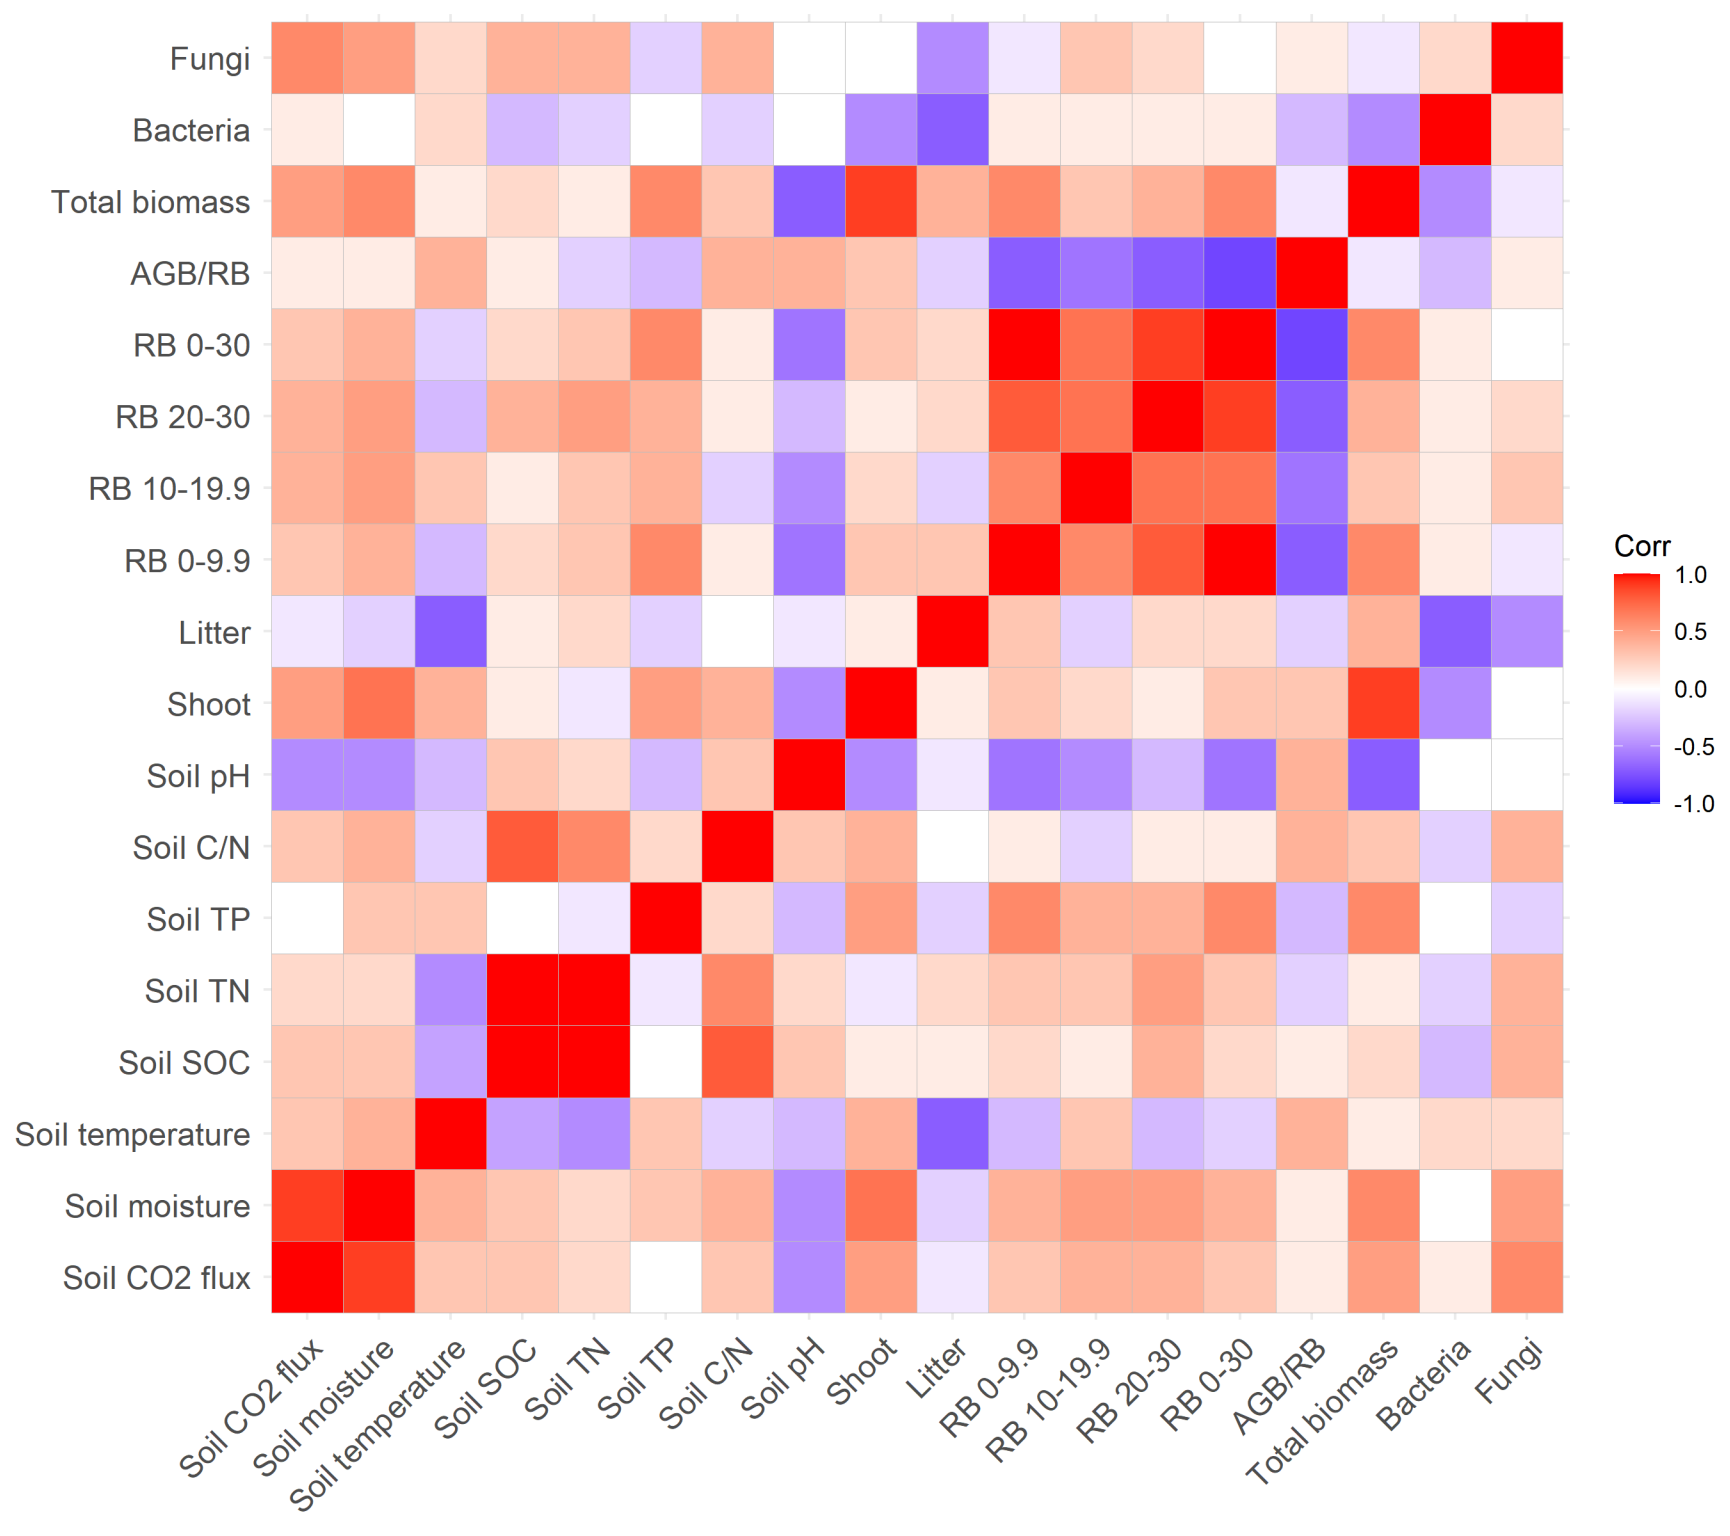

Supplement: peerj-09-10729-s007.pdf [file peerj-09-10729-s007.pdf]
